# Supplementary material for: The Presence of EpCAM-/CD49f+ Cells in Breast Cancer Is Associated with a Poor Clinical Outcome
Source: PubMed Central journal article supplement — J Breast Cancer. 2015 Sep 24;18(3):242–8. doi: 10.4048/jbc.2015.18.3.242 (PMC4600688; doi:10.4048/jbc.2015.18.3.242), 2015-09-24
Supplement: jbc-18-242-s003.pdf [file jbc-18-242-s003.pdf]

**Supplementary Table 2.** Correlation of prevalence of EpCAM/CD49 with breast cancer prognosis (multivariate analysis)

|                                           | No. (%)    | DFS             |                     | OS              |                     |
|-------------------------------------------|------------|-----------------|---------------------|-----------------|---------------------|
|                                           |            | <i>p</i> -value | HR (95% CI)         | <i>p</i> -value | HR (95% CI)         |
| EpCAM <sup>+</sup> /CD49 <sup>+</sup> (%) | 150        | 0.010           |                     | 0.002           |                     |
| - (0)                                     | 103 (68.7) |                 | 1                   |                 | 1                   |
| + (>0)                                    | 47 (31.3)  |                 | 2.070 (1.188–3.608) |                 | 3.235 (1.551–6.748) |
| EpCAM <sup>+</sup> /CD49 <sup>f</sup> (%) | 150        | 0.061           |                     | 0.042           |                     |
| - (0)                                     | 110 (73.3) |                 | 1                   |                 | 1                   |
| + (>0)                                    | 40 (26.7)  |                 | 1.813 (0.974–3.377) |                 | 2.250 (1.031–4.907) |
| EpCAM <sup>+</sup> /CD49 <sup>f</sup> (%) | 150        | 0.267           |                     | 0.455           |                     |
| - (0)                                     | 94 (22.3)  |                 | 1                   |                 | 1                   |
| + (>0)                                    | 56 (77.7)  |                 | 1.357 (0.792–2.323) |                 | 1.308 (0.647–2.646) |
| EpCAM <sup>-</sup> /CD49 <sup>f</sup> (%) | 150        | 0.302           |                     | 0.444           |                     |
| - (0)                                     | 26 (17.3)  |                 | 1                   |                 | 1                   |
| + (>0)                                    | 124 (82.7) |                 | 0.713 (0.376–1.351) |                 | 0.721 (0.312–1.666) |

EpCAM = epithelial cell adhesion molecule; DFS = disease-free survival; OS = overall survival; HR = hazard risk; CI = confidence interval.
